# Supplementary material for: Activity Screening of Fatty Acid Mimetic Drugs Identified Nuclear Receptor Agonists
Source: Int J Mol Sci. 2022 Sep 3;23(17):10070. doi: 10.3390/ijms231710070 (PMC9456086; doi:10.3390/ijms231710070)
Supplement: Supplementary file 1 [file ijms-23-10070-s001.zip › Table_S1.csv]

Table S1. FAM screening results dataset (Table_S1.csv) showing fold activation of the studied nu-clear receptors by the screened FAM drugs at 50 ?M.
drug INN	SMILES	RARa	PPARa	PPARg	PPARd	VDR	LXRa	FXR	RXRa
Aceclofenac	C1=CC=C(C(=C1)CC(=O)OCC(=O)O)NC2=C(C=CC=C2Cl)Cl	2.1	2	7.3	2.2	3.4	1.3	1.1	3.1
Acitretin	CC1=CC(=C(C(=C1/C=C/C(=C/C=C/C(=C/C(=O)O)/C)/C)C)C)OC	91.7	2.1	3.2	2.1	1.1	1.1	1.2	20.9
Agomelatin	CC(=O)NCCC1=CC=CC2=C1C=C(C=C2)OC	0.9	1.3	2.3	1.8	0.9	1.3	0.9	1.1
a-Linolenic acid	CC/C=C\C/C=C\C/C=C\CCCCCCCC(=O)O	1.6	1.3	2	1.2	0.7	0.9	1.2	1.1
Alitretinoin	CC1=C(C(CCC1)(C)C)/C=C/C(=C\C=C\C(=C\C(=O)O)\C)/C	37.1	2.9	3.8	1.5	2.5	1.3	8.5	32.2
Alprostatil	CCCCC[C@@H](/C=C/[C@H]1[C@@H](CC(=O)[C@@H]1CCCCCCC(=O)O)O)O	0.7	1.4	2.3	2.1	1.2	1.4	0.8	1.3
Alvimopan	C[C@H]1CN(CC[C@@]1(C)C2=CC(=CC=C2)O)C[C@H](CC3=CC=CC=C3)C(=O)NCC(=O)O	0.9	1.9	1.4	1.2	0.8	1.1	0.9	1.8
Artesunate	C[C@@H]1CC[C@H]2[C@H]([C@@H](O[C@H]3[C@@]24[C@H]1CC[C@](O3)(OO4)C)OC(=O)CCC(=O)O)C	3.6	1.9	2.9	0.9	3.1	4.2	3.2	3
Atorvastatin	CC(C)C1=C(C(=C(N1CC[C@H](C[C@H](CC(=O)O)O)O)C2=CC=C(C=C2)F)C3=CC=CC=C3)C(=O)NC4=CC=CC=C4	0.7	0.9	2.4	1.6	1.6	1.7	1.3	1.1
Baclofen	C1=CC(=CC=C1C(CC(=O)O)CN)Cl	0.9	1.2	1	1.1	0.9	0.9	0.7	1.1
Benazeprilat	C1CC2=CC=CC=C2N(C(=O)[C@H]1N[C@@H](CCC3=CC=CC=C3)C(=O)O)CC(=O)O	1.2	0.9	1.2	2.1	0.6	1	0.8	1
Bexarotene	CC1=CC2=C(C=C1C(=C)C3=CC=C(C=C3)C(=O)O)C(CCC2(C)C)(C)C	4	19	10	7.2	1.2	1	0.8	31.2
Bezafibrate	CC(C)(C(=O)O)OC1=CC=C(C=C1)CCNC(=O)C2=CC=C(C=C2)Cl	1.5	15.7	9.8	22.2	1.1	1.5	1.1	1.2
Bortezomib	B([C@H](CC(C)C)NC(=O)[C@H](CC1=CC=CC=C1)NC(=O)C2=NC=CN=C2)(O)O	16.9	1.2	0.8	0.6	0.6	0.6	0.5	0.9
Carprofen	CC(C1=CC2=C(C=C1)C3=C(N2)C=CC(=C3)Cl)C(=O)O	1.9	6.7	8	3.6	2	2.5	1.7	2.5
Celecoxib	CC1=CC=C(C=C1)C2=CC(=NN2C3=CC=C(C=C3)S(=O)(=O)N)C(F)(F)F
Diclofenac	C1=CC=C(C(=C1)CC(=O)O)NC2=C(C=CC=C2Cl)Cl	2.9	3.9	10.4	2.3	2.8	1.5	2.1	1.6
Dinoprostone	CCCCC[C@@H](/C=C/[C@H]1[C@@H](CC(=O)[C@@H]1C/C=C\CCCC(=O)O)O)O	3.6	1.2	1.6	3.3	1	1.3	0.7	1.1
Disopyramid	CC(C)N(CCC(C1=CC=CC=C1)(C2=CC=CC=N2)C(=O)N)C(C)C	1	1.4	1.4	1.1	2	0.9	0.8	0.7
Enalapril	CCOC(=O)[C@H](CCC1=CC=CC=C1)N[C@@H](C)C(=O)N2CCC[C@H]2C(=O)O	1.3	0.8	1	1.1	2.6	1.1	0.9	1.1
Epoprostenol	CCCCC[C@@H](/C=C/[C@H]1[C@@H](C[C@H]2[C@@H]1C/C(=C/CCCC(=O)O)/O2)O)O	0.6	1.4	1.4	1.1	1	1.7	0.8	1.3
Etodolac	CCC1=C2C(=CC=C1)C3=C(N2)C(OCC3)(CC)CC(=O)O	2	2.2	2.5	1.7	1	1.1	1	1.2
Fenofibrate	CC(C)OC(=O)C(C)(C)OC1=CC=C(C=C1)C(=O)C2=CC=C(C=C2)Cl
Fenoprofen	CC(C(O)=O)C1=CC(OC2=CC=CC=C2)=CC=C1	0.9	11.4	34.5	1.5	0.8	1.3	1.2	1
Fingolimod	CCCCCCCCC1=CC=C(C=C1)CCC(CO)(CO)N	0.8	1.1	1.1	1.5	1.2	1.4	1.1	1.9
Flurbiprofen	CC(C1=CC(=C(C=C1)C2=CC=CC=C2)F)C(=O)O	1.3	5.3	6.7	2.8	1.3	0.9	1	1.1
Fluvastatin	CC(C)N1C2=CC=CC=C2C(=C1/C=C/[C@H](C[C@H](CC(=O)O)O)O)C3=CC=C(C=C3)F
Gemfibrozil	CC1=CC(=C(C=C1)C)OCCCC(C)(C)C(=O)O	1.2	5.1	3.2	0.9	1.5	1.2	0.9	1.4
g-Linolenic acid	CCCCC/C=C\C/C=C\C/C=C\CCCCC(=O)O	1.1	0.9	1.3	1.3	0.6	0.9	0.8	1
Ibuprofen	CC(C)CC1=CC=C(C=C1)C(C)C(=O)O	1	8.4	5.8	5.1	1	1.5	0.9	1.1
Illoprost	CC#CCC(C)[C@@H](/C=C/[C@H]1[C@@H](C[C@H]2[C@@H]1C/C(=C/CCCC(=O)O)/C2)O)O	0.9	1.2	1.5	1.1	1	0.7	0.8	0.7
Indometacin	CC1=C(C2=C(N1C(=O)C3=CC=C(C=C3)Cl)C=CC(=C2)OC)CC(=O)O	1.4	6.4	31	2.1	1.8	1.5	1.5	1.1
Ketoprofen	CC(C1=CC(=CC=C1)C(=O)C2=CC=CC=C2)C(=O)O	1.5	3.7	8.7	1.3	1	0.9	1.2	1.3
Levetiracetam	CC[C@@H](C(=O)N)N1CCCC1=O	0.9	1.1	2.5	0.7	0.7	1.1	0.8	1.5
Limaprost	CCCC[C@H](C)C[C@@H](/C=C/[C@H]1[C@@H](CC(=O)[C@@H]1CCCC/C=C/C(=O)O)O)O	0.7	0.8	1.6	1.2	0.6	1.2	0.8	1
Linezolid	CC(=O)NC[C@H]1CN(C(=O)O1)C2=CC(=C(C=C2)N3CCOCC3)F	0.7	1.1	1.5	1.1	1.1	1.4	0.9	1.3
Lornoxicam	CN1C(=C(C2=C(S1(=O)=O)C=C(S2)Cl)O)C(=O)NC3=CC=CC=N3	8.4	0.9	1.2	1.2	4.1	3	3.9	1
Lovastatin	CC[C@H](C)C(=O)O[C@H]1C[C@H](C=C2[C@H]1[C@H]([C@H](C=C2)C)CC[C@@H]3C[C@H](CC(=O)O3)O)C	2.3	2.6	2.6	4	1.2	2.7	2.5	5.1
Meclofenamic acid	CC1=C(C(=C(C=C1)Cl)NC2=CC=CC=C2C(=O)O)Cl
Mefenamic acid	CC1=C(C(=CC=C1)NC2=CC=CC=C2C(=O)O)C	1.8	4.3	5.7	9.9	2.8	3.1	2.1	3.6
Misoprostol	CCCCC(C)(C/C=C/[C@H]1[C@@H](CC(=O)[C@@H]1CCCCCCC(=O)OC)O)O	1	0.8	1.4	1.2	1.1	1.1	0.9	1.1
Moexipril	CCOC(=O)[C@H](CCC1=CC=CC=C1)N[C@@H](C)C(=O)N2CC3=CC(=C(C=C3C[C@H]2C(=O)O)OC)OC	1	1	1.1	1	1	0.8	1.1	0.9
Mycophenolic acid	CC1=C2COC(=O)C2=C(C(=C1OC)C/C=C(\C)/CCC(=O)O)O	11.4	1.3	2.8	1.1	0.9	1	0.8	0.7
Naproxen	C[C@@H](C1=CC2=C(C=C1)C=C(C=C2)OC)C(=O)O	1.5	3.4	2.6	2.4	1.2	0.8	2.1	1.2
Nepafenac	C1=CC=C(C=C1)C(=O)C2=CC=CC(=C2N)CC(=O)N	1	1	1.1	0.9	1.1	0.8	0.9	0.8
Oxaprozin	C1=CC=C(C=C1)C2=C(OC(=N2)CCC(=O)O)C3=CC=CC=C3	0.8	1.3	6.5	1	1.1	1.3	1.3	40.3
Paracetamol	CC(=O)NC1=CC=C(C=C1)O	0.9	0.6	0.9	1	1	1.1	1	1.2
Perindopril	CCC[C@@H](C(=O)OCC)N[C@@H](C)C(=O)N1[C@H]2CCCC[C@H]2C[C@H]1C(=O)O	1.1	1.2	1.4	1.5	1.3	0.9	0.7	1.1
Piroxicam	CN1C(=C(C2=CC=CC=C2S1(=O)=O)O)C(=O)NC3=CC=CC=N3	1	1.4	1.5	1	1.1	0.9	0.9	1
Pravastatin	CC[C@H](C)C(=O)O[C@H]1C[C@@H](C=C2[C@H]1[C@H]([C@H](C=C2)C)CC[C@H](C[C@H](CC(=O)O)O)O)O	1.1	0.7	0.9	1.2	1.1	1	0.9	1.3
Quinapril	CCOC(=O)[C@H](CCC1=CC=CC=C1)N[C@@H](C)C(=O)N2CC3=CC=CC=C3C[C@H]2C(=O)O	0.9	0.7	1.3	1	1	1.1	0.8	1
Ramipril	CCOC(=O)[C@H](CCC1=CC=CC=C1)N[C@@H](C)C(=O)N2[C@H]3CCC[C@H]3C[C@H]2C(=O)O	0.6	0.7	1	1	1	1	0.7	1.2
Rosuvastatin	CC(C)C1=NC(=NC(=C1/C=C/[C@H](C[C@H](CC(=O)O)O)O)C2=CC=C(C=C2)F)N(C)S(=O)(=O)C	1.7	1.2	1.4	1.3	1.2	1.2	0.9	1.6
Sacubitril	CCOC(=O)[C@H](C)C[C@@H](CC1=CC=C(C=C1)C2=CC=CC=C2)NC(=O)CCC(=O)O	0.8	1.4	1.1	1.4	1.5	1.4	1.1	0.8
Simvastatin	CCC(C)(C)C(=O)O[C@H]1C[C@H](C=C2[C@H]1[C@H]([C@H](C=C2)C)CC[C@@H]3C[C@H](CC(=O)O3)O)C
Tiagabine	CC1=C(SC=C1)C(=CCCN2CCC[C@H](C2)C(=O)O)C3=C(C=CS3)C	1	1.2	1.3	1.5	1	1.2	0.9	1.4
Tianeptine	CN1C2=CC=CC=C2C(C3=C(S1(=O)=O)C=C(C=C3)Cl)NCCCCCCC(=O)O	0.6	0.9	4.1	9	1	0.8	0.9	1
Tiaprofenic acid	CC(C1=CC=C(S1)C(=O)C2=CC=CC=C2)C(=O)O	1	2.2	4.8	0.9	1.1	1.3	0.9	1.4
Tolmetin	CC1=CC=C(C=C1)C(=O)C2=CC=C(N2C)CC(=O)O	0.8	0.8	1.8	1	1.1	1.1	0.8	1.1
Travoprost	CC(C)OC(=O)CCC/C=C\C[C@H]1[C@H](C[C@H]([C@@H]1/C=C/[C@H](COC2=CC=CC(=C2)C(F)(F)F)O)O)O	0.8	0.7	1.3	1.8	1	1.7	3.7	1.1
Treprostinil	CCCCC[C@@H](CC[C@H]1[C@@H](C[C@H]2[C@@H]1CC3=C(C2)C(=CC=C3)OCC(=O)O)O)O	1.1	0.8	1.3	1.4	1	1	0.9	0.9
Tretinoin	CC1=C(C(CCC1)(C)C)/C=C/C(=C/C=C/C(=C/C(=O)O)/C)/C	328.4	1.5	1.4	1.2	1.4	1.6	1.3	132.3
Unoprostone	CCCCCCCC(=O)CC[C@H]1[C@@H](C[C@@H]([C@@H]1C/C=C\CCCC(=O)O)O)O	2.9	2.7	1.2	1.3	0.8	0.9	1.1	1
Zaltoprofen	CC(C1=CC2=C(C=C1)SC3=CC=CC=C3C(=O)C2)C(=O)O	0.7	7	29.5	4.3	2.4	1.5	0.9	2
