# Supplementary figures and images for: Activity Screening of Fatty Acid Mimetic Drugs Identified Nuclear Receptor Agonists
Source: MDPI journal article supplement (doi:10.3390/ijms231710070), 2022-09-03

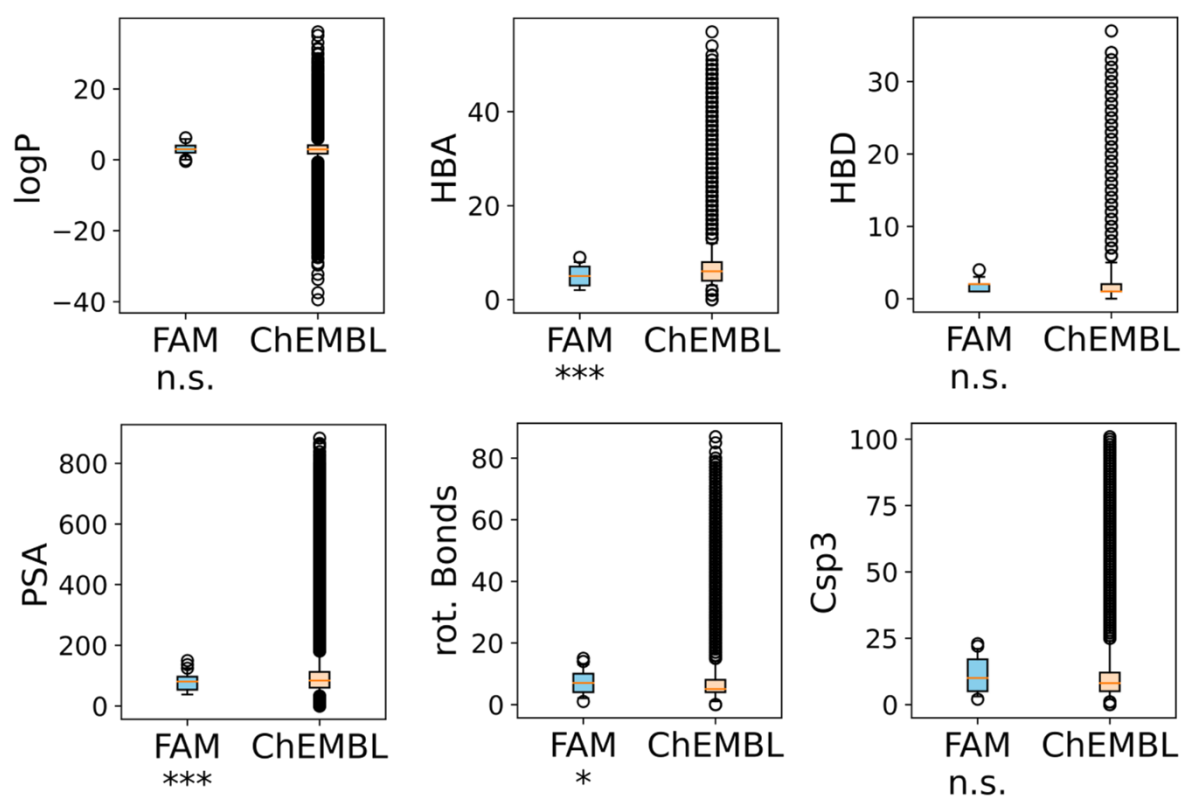

**Figure S1.** Basic molecular descriptors of FAM drugs compared to ChEMBL compounds. \*  $p < 0.05$ , \*\*\*  $p < 0.001$  (ttest).

Supplement: s1 [file s1]
